# Supplementary material for: The Aftermath: Post-pandemic Psychiatric Implications of the COVID-19 Pandemic, a South Korean Perspective
Source: PubMed Central journal article supplement (PMC8566744; doi:10.3389/fpsyt.2021.671722), 2021-10-21
Supplement: Table_2.pdf [file Table_2.pdf]

Supplementary table 2. Summary of included studies in the meta-analysis. \*excluded in quantitative synthesis

| Leading author         | Year | Country     | Period of data collecting (Data Source)                                                                                                                                                                                                                     | Sample size (Before vs. During)                                                 | Outcome reported                                                                                                                                                                                         | Assessment tool                                                                                                                                                                                     | Category of outcome               | etc.                                                                                                                                                |
|------------------------|------|-------------|-------------------------------------------------------------------------------------------------------------------------------------------------------------------------------------------------------------------------------------------------------------|---------------------------------------------------------------------------------|----------------------------------------------------------------------------------------------------------------------------------------------------------------------------------------------------------|-----------------------------------------------------------------------------------------------------------------------------------------------------------------------------------------------------|-----------------------------------|-----------------------------------------------------------------------------------------------------------------------------------------------------|
| <b>Ettman</b>          | 2020 | USA         | 2017 to 2018 vs. March 31, 2020 - April 13, 2020 (National Health & Nutrition Examination Survey)                                                                                                                                                           | 5,065 vs. 1,441                                                                 | Increase in depression prevalence (>3-fold)                                                                                                                                                              | PHQ-9 ≥ 10                                                                                                                                                                                          | Depression                        |                                                                                                                                                     |
| <b>Twenge</b>          | 2020 | USA         | January - June 2019 vs. April 23 - May 26, 2020 (National Health Interview Survey & Household Pulse Survey)                                                                                                                                                 | 336,525                                                                         | Increase in depressive disorders, anxiety disorders, or one or both (>3-fold)                                                                                                                            | PHQ-2 ≥ 3<br>GAD-2 ≥ 3                                                                                                                                                                              | Depression<br>Anxiety             |                                                                                                                                                     |
| <b>Castellini</b>      | 2020 | Italy       | December 1, 2019 - January 15, 2020 vs. April 22 - May 3, 2020                                                                                                                                                                                              | 130                                                                             | Increase in depressive symptoms, but no changes in anxiety                                                                                                                                               | BSI                                                                                                                                                                                                 | Depression<br>Anxiety             |                                                                                                                                                     |
| <b>*Ramiz</b>          | 2021 | France      | November 2014 and December 2019 vs. April 15, 2020 and May 4, 2020 (MAVIE cohort)                                                                                                                                                                           | 1,237                                                                           | Depression remained unchanged from 27.0% at recruitment to 27.6% at lockdown. Anxiety symptoms increased from 17.3 to 20.1%                                                                              | PHQ-9 ≥ 4<br>GAD-7 ≥ 4                                                                                                                                                                              | Depression<br>Anxiety             | No. with PHQ-9 ≥ 10 not indicated<br>No. with GAD-7 ≥ 10 not indicated                                                                              |
| <b>*van der Velden</b> | 2020 | Netherlands | March 2019 vs. March 2020 (Dutch longitudinal population-based LISS panel)                                                                                                                                                                                  | 3,983                                                                           | No increase in depression and anxiety symptoms                                                                                                                                                           | MHI-5 < 60                                                                                                                                                                                          | Depression<br>Anxiety             | No value specific to depression and anxiety                                                                                                         |
| <b>*van der Velden</b> | 2021 | Netherlands | November 2019, March 2020, and June 2020 (Dutch longitudinal population-based LISS panel)                                                                                                                                                                   | 4,084                                                                           | Lower prevalence of anxiety and depression after the outbreak (June 2020, 15.3%) than before (16.8%) and during the outbreak (17.2%)                                                                     | MHI-5 < 60                                                                                                                                                                                          | Depression<br>Anxiety             | No value specific to depression and anxiety                                                                                                         |
| <b>Winkler</b>         | 2020 | Czech       | November 2017 (Czech Mental Health Study) vs. May 6 - 20, 2020                                                                                                                                                                                              | 3,306 vs. 3,021                                                                 | Increase in depression (3-fold) and anxiety symptoms (2-fold)                                                                                                                                            | MINI                                                                                                                                                                                                | Depression<br>Anxiety             |                                                                                                                                                     |
| <b>Brailovskaia</b>    | 2020 | Germany     | October 2019 vs. March 20, 2020 (Bochum Optimism and Mental Health project)                                                                                                                                                                                 | 436                                                                             | Depression and anxiety at baseline (October 2019) did not predict burden at follow-up (March 2020). But, stress symptoms assessed at baseline were a significant predictor of higher burden at follow-up | DASS-21                                                                                                                                                                                             | Depression<br>Anxiety<br>Stress   |                                                                                                                                                     |
| <b>Ruggieri</b>        | 2020 | Italy       | March 7 - 9, 2020 (pre-quarantine)<br>March 25 - 27, 2020 (post-quarantine)<br>April 12 - 14, 2020 (post-quarantine)                                                                                                                                        | March 7 - 9, 2020 : 113<br>March 25 - 27, 2020 : 75<br>April 12 - 14, 2020 : 80 | Increase in depression, anxiety, and stress                                                                                                                                                              | DASS-21                                                                                                                                                                                             | Depression<br>Anxiety<br>Stress   |                                                                                                                                                     |
| <b>Hallwa</b>          | 2021 | USA         | September - December 2019 vs. April - June 2020<br>Sample 1 : December 4 - 10, 2019 vs. April 3 - 15, 2020<br>Sample 2 : October 6 - 13, 2019 vs. May 14 - 25, 2020<br>Sample 3 : September 18 - 26, 2019 vs. June 10 - 19, 2020 (Amazon's Mechanical Turk) | Sample 1 : 300<br>Sample 2 : 146<br>Sample 3 : 142                              | Significant increases in anxiety and stress. But no change in depression                                                                                                                                 | Depression :<br>- Sample 1 & 3 : PHQ-8 ≥ 10<br>- Sample 2 : DASS-21<br>Anxiety :<br>- Sample 1 & 3 : GAD-7 ≥ 10<br>- Sample 2 : DASS-21<br>Stress :<br>- Sample 1 & 3 : PSS<br>- Sample 2 : DASS-21 | Depression<br>Anxiety<br>Stress   | Analysis with sample 1 and sample 3 for depression and anxiety; sample 2 for psychological distress                                                 |
| <b>Ayuso-Mateos</b>    | 2021 | Spain       | June 17, 2019 - March 14, 2020<br>May 21, 2020 - June 30, 2020 (Edad con Salud project)                                                                                                                                                                     | 1,103                                                                           | No change in depression and suicidal ideation                                                                                                                                                            | CIDI 3.0                                                                                                                                                                                            | Depression<br>Suicidal ideation   |                                                                                                                                                     |
| <b>*Sueki and Ueda</b> | 2021 | Japan       | January 24, 2020 vs. April 27 and 30, 2020                                                                                                                                                                                                                  | 6,683                                                                           | Decrease in suicidal ideation                                                                                                                                                                            | Suicidal ideation scale                                                                                                                                                                             | Suicidal ideation                 |                                                                                                                                                     |
| <b>*Savolainen</b>     | 2021 | Finland     | September 16 and October 15, 2019 vs. September 15 and October 22, 2020 (Social Media at Work in Finland survey)                                                                                                                                            | 1,044                                                                           | Increase in psychological distress<br>Women and young people experienced higher anxiety                                                                                                                  | STAI-6<br>GHQ-12                                                                                                                                                                                    | Psychological distress<br>Anxiety | Not suitable measure in anxiety (post-pandemic anxiety as dependent variable). No. with psychological distress not indicated (GHQ values not given) |
| <b>McGinty</b>         | 2020 | USA         | 2018 (National Health Interview Survey) vs. April 7 - 13, 2020 (Johns Hopkins COVID-19 Civic Life & Public Health Survey)                                                                                                                                   | 25,417 vs. 1,468                                                                | Increase in psychological distress                                                                                                                                                                       | Kessler 6 ≥ 13                                                                                                                                                                                      | Psychological distress            |                                                                                                                                                     |
| <b>Pierce</b>          | 2020 | UK          | 2018-19 vs. April 2020 (UK household longitudinal study)                                                                                                                                                                                                    | 17,452                                                                          | Increase in psychological distress                                                                                                                                                                       | GHQ-12 ≥ 4                                                                                                                                                                                          | Psychological distress            |                                                                                                                                                     |
| <b>Niedzwiedz</b>      | 2020 | UK          | 2017-2019 vs. April 23-30, 2020 (UK household longitudinal study)                                                                                                                                                                                           | 9,748                                                                           | Increase in psychological distress                                                                                                                                                                       | GHQ-12 ≥ 4                                                                                                                                                                                          | Psychological distress            |                                                                                                                                                     |
| <b>Ferry</b>           | 2020 | UK          | January 2017- December 2018 vs. April 2020 (UK household longitudinal study)                                                                                                                                                                                | 8,708                                                                           | Increase in psychological distress                                                                                                                                                                       | GHQ-12 ≥ 4                                                                                                                                                                                          | Psychological distress            |                                                                                                                                                     |
| <b>Canady</b>          | 2021 | USA         | February 2019 vs. May 2020 (Rand American Life Panel)                                                                                                                                                                                                       | 2,555 vs. 1,870                                                                 | No change in psychological distress                                                                                                                                                                      | Kessler 6                                                                                                                                                                                           | Psychological distress            |                                                                                                                                                     |
| <b>Kuhn</b>            | 2021 | Switzerland | September 2, 2019 - March 3, 2020 vs. May 12 - June 30, 2020 (Swiss Household Panel)                                                                                                                                                                        | 5,859                                                                           | Reduced stress levels significantly                                                                                                                                                                      | Stress was captured with the question how often respondents felt stressed during the last 2 weeks, with answers ranging from never (1) to very often (5)                                            | Perceived stress                  |                                                                                                                                                     |
| <b>Novotny</b>         | 2020 | Czech       | December 19, 2014 vs. April 24 to May 27, 2020                                                                                                                                                                                                              | 715                                                                             | Increase in stress (1.4-fold) and depressive symptoms (5.5-fold)                                                                                                                                         | PSS<br>PHQ-9 (before COVID-19)<br>+ PHQ-4 (during COVID-19) ≥ 3                                                                                                                                     | Depression<br>Perceived stress    | No. with PHQ-9 ≥ 10 not indicated<br>No. with GAD-7 ≥ 10 not indicated                                                                              |
| <b>*Paschke</b>        | 2021 | Germany     | September 13 - 27, 2019 vs. April 20 - 30, 2020                                                                                                                                                                                                             | 824 adolescents<br>824 respective parents                                       | Increase in psychological stress during COVID-19                                                                                                                                                         | PSS-4 ≥ 8                                                                                                                                                                                           | Perceived Stress                  | No. with psychological distress not indicated (PSS values not given)                                                                                |
| <b>*Daly</b>           | 2020 | UK          | 2017-2019 vs. April, May, and June 2020 (UK household longitudinal study)                                                                                                                                                                                   | 14,393                                                                          | Prevalence of mental health problems (GHQ-12 ≥ 3) increased from 24.3% in 2017-2019 to 37.8% in April 2020 and remained elevated in May (34.7%) and June (31.9%) 2020                                    | GHQ-12 ≥ 3                                                                                                                                                                                          | Psychological distress            | Same sample as Niedzwiedz et al., 2020                                                                                                              |
